# Supplementary material for: Effect of UV Irradiation of Pre-Gel Solutions on the Formation of Collagen Gel Tubes
Source: MDPI journal article supplement (doi:10.3390/gels9060458), 2023-06-02
Supplement: s1 [file s1]

## Supporting Information

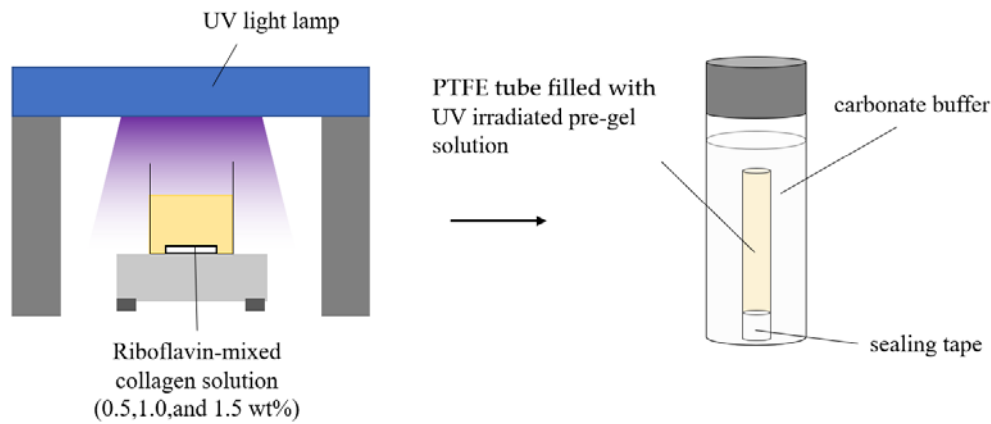

Collagen solutions were irradiated with a UV light source for 10, 20, 30, and 60 minutes.

PTFE tubes filled with collagen solutions were immersed in carbonate buffer and refrigerated at 7°C for 5 days.

**Figure S1.** Schematic diagram illustrating the preparation method of thin hollow collagen gel rod from the UV-treated collagen solution.

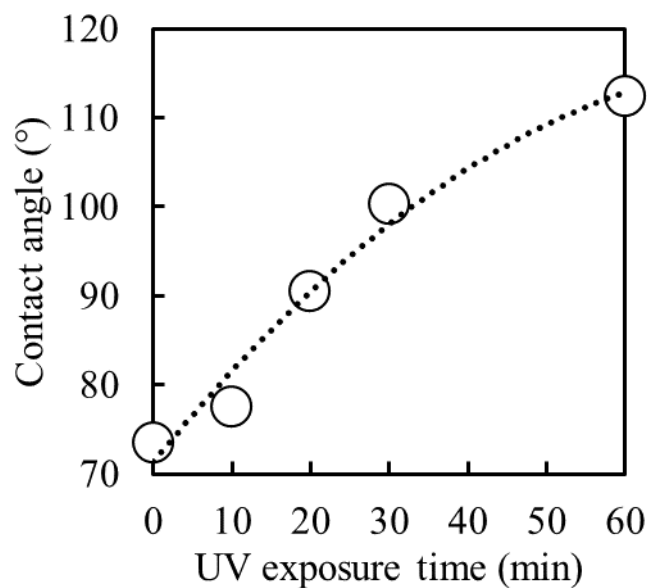

**Figure S2.** Contact angles of sheets dried after casting UV-irradiated collagen solution: The contact angles between the collagen sheet and the droplet formed by dropping 5  $\mu\text{L}$  of ultrapure water on various collagen sheets were measured at 20 °C. The collagen sheets were obtained by the following method: a drop of 20  $\mu\text{L}$  of the given UV-treated 1 wt% aqueous collagen solution was dropped onto a glass slide, cast, and then dried in a constant temperature and humidity chamber at 20 °C and 60% RH for 24 hours.
